# Supplementary material
Source: PubMed Central journal article supplement (PMC7294087)
Supplement: supp_RA120.013752_159958_2_supp_521255_q9k20n.pdf [file supp_RA120.013752_159958_2_supp_521255_q9k20n.pdf]

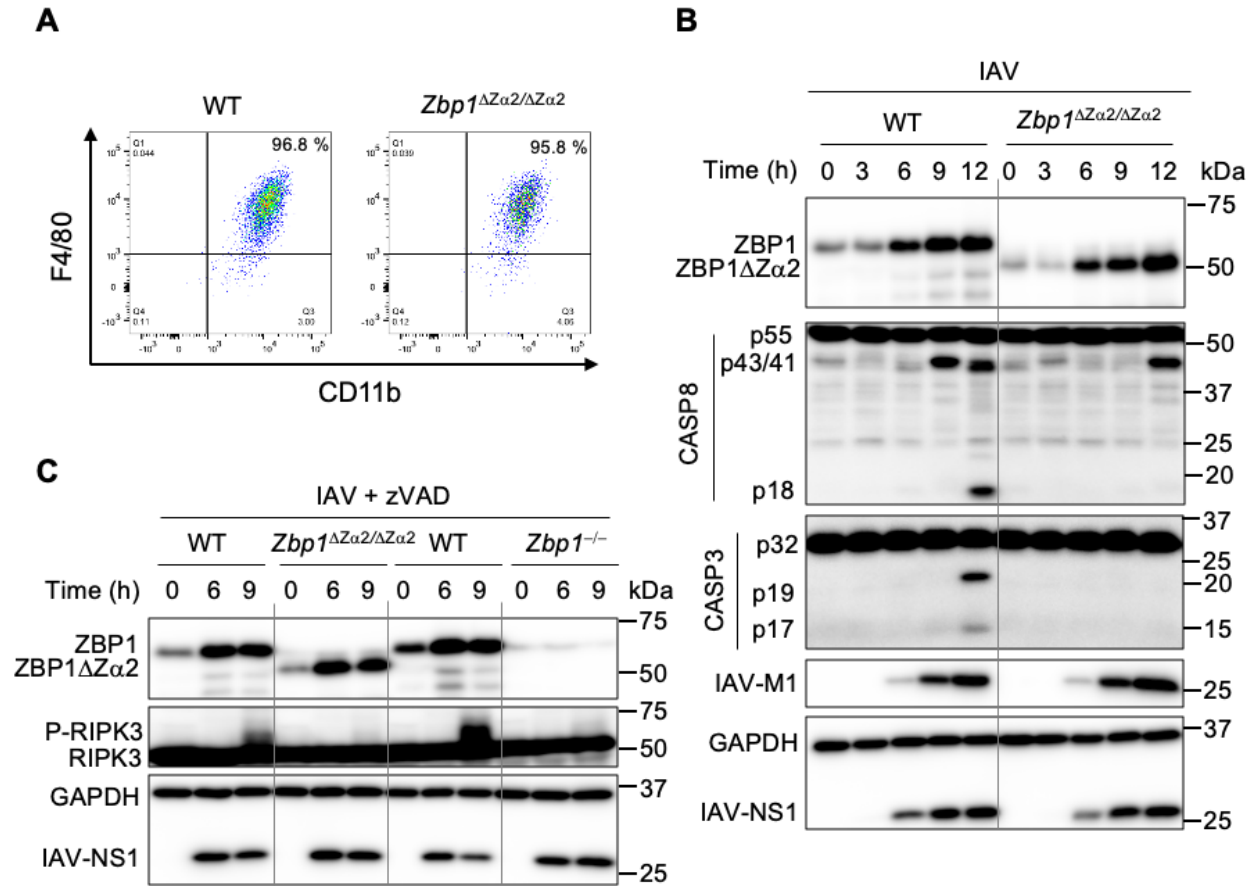

**Figure S1: Analysis of macrophage differentiation and CASP3, CASP8 and RIPK3 activation after deletion of  $Z\alpha 2$  domain of ZBP1**

**A**, Flow cytometry analysis of ex vivo BMDMs from WT and  $Zbp1^{\Delta Z\alpha 2/\Delta Z\alpha 2}$  mice for expression of myeloid-specific markers, F4/80 and CD11b. **B and C**, Immunoblot analysis of caspase-3 (CASP3), caspase-8 (CASP8), RIPK3, phosphorylated RIPK3 (P-RIPK3), IAV-M1, IAV-NS1, and GAPDH in WT and  $Zbp1^{\Delta Z\alpha 2/\Delta Z\alpha 2}$  BMDMs infected with IAV (**B**) or infected with IAV and subsequently treated with the pan-caspase inhibitor (zVAD, 30  $\mu$ M) (**C**).

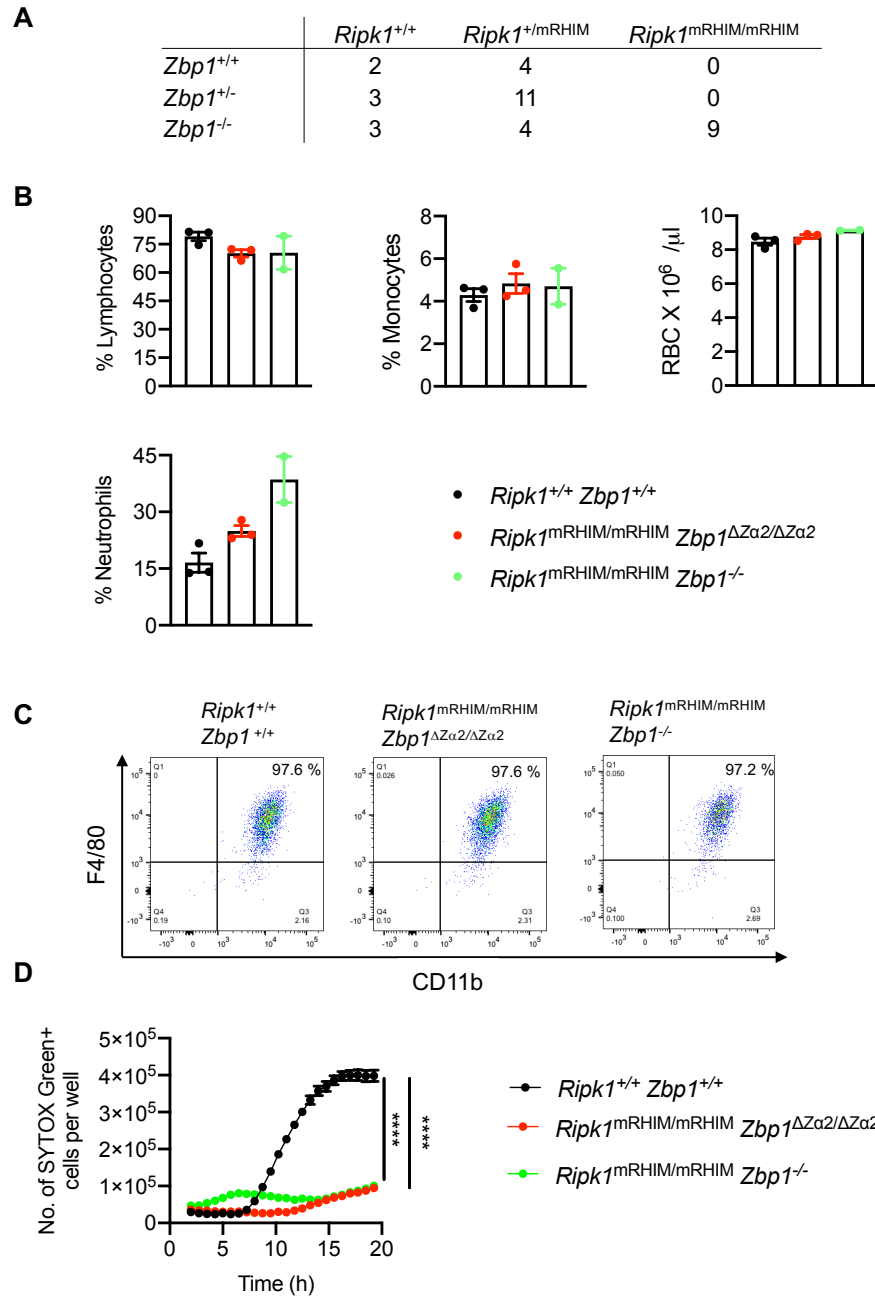

**Figure S2: Immune cell population in *Ripk1*<sup>mRHIM/mRHIM</sup>*Zbp1*<sup>ΔZα2/ΔZα2</sup> and *Ripk1*<sup>mRHIM/mRHIM</sup>*Zbp1*<sup>-/-</sup> mice and IAV-induced cell death**

**A**, Table representing the number of offspring of each genotype generated from intercrossing *Ripk1*<sup>+mRHIM</sup>*Zbp1*<sup>+/-</sup> (heterozygote) parents. **B**, Analysis of the number or percent of different immune cell types from the blood from indicated mouse strains ( $n > 2$  in each genotype). Data are represented as mean  $\pm$  s.e.m. **C**, Flow cytometry analysis of ex vivo BMDMs from the indicated mouse strains for expression of myeloid-specific markers, F4/80 and CD11b. **D**, Cell death as measured by the number of SYTOX Green<sup>+</sup> cells. BMDMs differentiated from the indicated mouse strains were infected with IAV, and cell death was monitored at regular intervals. \*\*\*\* $P < 0.0001$  (one-way ANOVA). Data are represented as mean  $\pm$  s.e.m. and are representative of two independent experiments.

| Name                                                                                                  | Sequence (5' to 3')                                                                                                            |
|-------------------------------------------------------------------------------------------------------|--------------------------------------------------------------------------------------------------------------------------------|
| mZBP1.5'.sgRNA spacer                                                                                 | AGCAUAGGCGGGGCUUC                                                                                                              |
| mZBP1.3'.sgRNA spacer                                                                                 | ATCTACCACTCACGTCAGGA                                                                                                           |
| mZBP1 deletion ssODN donor<br>Silent Blocking modification (upper case)<br>*phosphorothioate linkages | a*c*ctgacccttgatccctgacctccccacactgactttgcctgtcatacctatgtcttgeccatctcc<br>GCTagcagccccgcctatgctccatgtgcaggctctggggaggacact*c*t |
| mZBP1.deletion.NGS.F partial Illumina adaptors (upper case)                                           | CACTCTTTCCCTACACGACGCTCTTCCGATCTaggtgccttctgctctgg<br>ggact                                                                    |
| mZBP1.deletion.NGS.R partial Illumina adaptors (upper case)                                           | GTGACTGGAGTTCAGACGTGTGCTCTTCCGATCTacaaacatctggcc<br>ctacaccatct                                                                |

**Table S1:** List of CRISPR/Cas9 gene editing construct sequences and relevant primers.
